# Supplementary material for: Balancing Selection on a Regulatory Region Exhibiting Ancient Variation That Predates Human–Neandertal Divergence
Source: PLoS Genet. 2013 Apr 11;9(4):e1003404. doi: 10.1371/journal.pgen.1003404 (PMC3623772; doi:10.1371/journal.pgen.1003404)
Supplement: Table S4 — FST values among populations for NE1 locus. SNPs of 12 populations were collected from 1000 Genomes phase1. 3 dataset (all haplotypes, haplotypes containing CNVR8163.1 deletions and haplotypes without CNVR8163.1 deletions) were generated for each population. For instance, ASW represents all haplotypes from this population; ASW_NE1 represents ASW haplotypes with CNVR8163.1 deletions and ASW_NonNE1 represents haplotypes without CNVR8163.1 deletions. All YRI haplotypes don't contain CNVR8163.1 deletion, and one haplotype from the PUR population containing the CNVR8163.1 deletion was excluded from this analysis. (XLSX) [file pgen.1003404.s014.xlsx]

## Sheet: Table S4
Table S4: FST values among populations for NE1 locus
	ASW_NE1	ASW_NonNE1	LWK	LWK_NE1	LWK_NonNE1	YRI	YRI_NonNE1	CHB	CHB_NE1	CHB_NonNE1	CHS	CHS_NE1	CHS_NonNE1	JPT	JPT_NE1	JPT_NonNE1	CEU	CEU_NE1	CEU_NonNE1	FIN	FIN_NE1	FIN_NonNE1	GBR	GBR_NE1	GBR_NonNE1	MXL	MXL_NE1	MXL_NE1	TSI	TSI_NE1	TSI_NonNE1	PUR	PUR_NonNE1
ASW
ASW_NE1	0.81772
ASW_NonNE1	0.06627	0.94498
LWK	0.04084	0.9084	0.03365
LWK_NE1	0.80574	0.23636	0.93262	0.89477
LWK_NonNE1	0.07847	0.93794	0.03382	0.00103	0.92486
YRI	0.08148	0.94096	0.02494	0.0123	0.928	0.00475
YRI_NonNE1	0.08148	0.94096	0.02494	0.0123	0.928	0.00475	-0.00645
CHB	0.02456	0.75002	0.1806	0.1494	0.74192	0.19927	0.20396	0.20396
CHB_NE1	0.83349	0.13295	0.95868	0.92265	0.32791	0.9517	0.95462	0.95462	0.76503
CHB_NonNE1	0.09351	0.94927	0.10173	0.1531	0.93762	0.20294	0.2028	0.2028	0.15523	0.963
CHS	0.00584	0.8325	0.11033	0.10346	0.82263	0.14754	0.15055	0.15055	0.01101	0.84688	0.06872
CHS_NE1	0.84048	0.11667	0.96548	0.92934	0.33636	0.95837	0.96127	0.96127	0.77293	0.06347	0.97003	0.85435
CHS_NonNE1	0.10899	0.95482	0.1297	0.17794	0.94311	0.23688	0.23815	0.23815	0.16719	0.96842	-0.00042	0.07472	0.97545
JPT	0.02386	0.76036	0.17799	0.1477	0.75189	0.19778	0.20261	0.20261	-0.00571	0.77531	0.15111	0.00765	0.78311	0.16152
JPT_NE1	0.83559	0.11347	0.9614	0.92511	0.32053	0.95431	0.95725	0.95725	0.7671	-0.00011	0.96584	0.84924	0.02389	0.97129	0.77731
JPT_NonNE1	0.09709	0.95005	0.11481	0.16175	0.93836	0.21531	0.21666	0.21666	0.15604	0.96376	-0.00067	0.06716	0.97081	-0.00559	0.14978	0.9666
CEU	0.17766	0.54166	0.38155	0.32899	0.5405	0.3817	0.38737	0.38737	0.09007	0.55951	0.37277	0.18197	0.56774	0.38531	0.09912	0.55996	0.37374
CEU_NE1	0.8395	0.11446	0.96459	0.92836	0.33361	0.95743	0.96035	0.96035	0.77193	0.10993	0.96911	0.85356	0.13856	0.97455	0.78221	0.06558	0.9699	0.56492
CEU_NonNE1	0.04749	0.91706	0.0838	0.10871	0.90573	0.1494	0.14983	0.14983	0.10086	0.93137	0.02541	0.03428	0.93852	0.05119	0.09737	0.93404	0.03409	0.30769	0.93745
FIN	0.16777	0.54301	0.37133	0.31914	0.54189	0.37189	0.37746	0.37746	0.08127	0.56071	0.36252	0.17174	0.56886	0.37484	0.09029	0.56124	0.36357	-0.00906	0.56626	0.2987
FIN_NE1	0.8332	0.08699	0.95958	0.9231	0.30801	0.95245	0.9554	0.9554	0.7647	0.03686	0.96403	0.84719	0.0429	0.96952	0.77504	0.00887	0.96481	0.55603	0.00492	0.93205	0.55722
FIN_NonNE1	0.07911	0.94394	0.08841	0.13052	0.93227	0.1749	0.17289	0.17289	0.14622	0.95794	0.01316	0.06803	0.96499	0.04416	0.14325	0.96073	0.03148	0.35832	0.96397	0.00721	0.34775	0.95885
GBR	0.11702	0.60359	0.3145	0.26426	0.59978	0.31737	0.32328	0.32328	0.04224	0.6206	0.30308	0.11837	0.62885	0.31615	0.04952	0.62156	0.30417	0.00098	0.6262	0.23837	-0.00469	0.61797	0.28785
GBR_NE1	0.82407	0.08652	0.95215	0.91525	0.28467	0.945	0.94801	0.94801	0.75451	0.05953	0.95649	0.83807	0.058	0.96207	0.76492	0.0287	0.95727	0.54308	0.00068	0.92404	0.54411	-0.01007	0.95116	0.6053
GBR_NonNE1	0.06548	0.93141	0.08454	0.11749	0.91994	0.15763	0.15956	0.15956	0.12547	0.94546	0.01554	0.05182	0.95256	0.04162	0.12207	0.94819	0.02707	0.33623	0.95148	0.00075	0.32657	0.94626	-0.00455	0.26442	0.93842
MXL	0.51369	0.21636	0.69348	0.64481	0.24684	0.68726	0.6918	0.6918	0.41534	0.2393	0.69339	0.52636	0.2433	0.70225	0.4276	0.23454	0.69407	0.16981	0.23872	0.64366	0.17165	0.22703	0.68375	0.23612	0.2117	0.66604
MXL_NE1	0.83929	0.08039	0.9651	0.92867	0.31652	0.95791	0.96083	0.96083	0.77174	0.12824	0.96971	0.85369	0.07225	0.97518	0.78206	0.07796	0.97051	0.56409	0.04524	0.93792	0.56531	0.01403	0.96456	0.62573	0.01663	0.95204	0.23327
MXL_NE1	0.036	0.87049	0.14162	0.12367	0.85948	0.17194	0.17615	0.17615	0.05781	0.88593	0.10091	0.03107	0.89315	0.13571	0.05485	0.88826	0.10473	0.22868	0.8918	0.02144	0.22277	0.88599	0.07445	0.16508	0.87733	0.04953	0.57053	0.89202
TSI	0.20743	0.5151	0.41279	0.35922	0.5151	0.41158	0.41734	0.41734	0.11555	0.53369	0.40508	0.21331	0.54168	0.41766	0.125	0.53374	0.40584	-0.00306	0.53873	0.33985	-0.00534	0.5295	0.39087	0.01139	0.51647	0.36858	0.14203	0.53759	0.25655
TSI_NE1	0.84018	0.10793	0.96535	0.9291	0.33246	0.95819	0.9611	0.9611	0.77265	0.09821	0.9699	0.85428	0.0991	0.97534	0.78291	0.04742	0.97069	0.56579	-0.00052	0.93826	0.56707	-0.00294	0.96478	0.6271	-0.00158	0.9523	0.23891	0.02096	0.89265	0.53952
TSI_NonNE1	0.0606	0.91996	0.11697	0.12766	0.9085	0.1741	0.17695	0.17695	0.11036	0.93439	0.05946	0.05084	0.94154	0.09531	0.10667	0.93706	0.06715	0.31115	0.94044	0.0023	0.30308	0.93504	0.03353	0.24291	0.92707	0.01739	0.64607	0.94092	0.00293	0.34131	0.94125
PUR	-0.03798	0.84298	0.01217	0.02172	0.83187	0.05335	0.05397	0.05397	0.00051	0.8573	-0.0113	-0.0495	0.86462	-0.00436	-0.00293	0.85965	-0.00953	0.19554	0.86378	-0.02808	0.18441	0.85762	-0.01177	0.12696	0.84873	-0.01807	0.54408	0.86382	-0.00845	0.22862	0.86447	-0.00748
PUR_NonNE1	0.09954	0.95559	0.08911	0.156	0.94389	0.20681	0.20364	0.20364	0.16969	0.96923	-0.00497	0.07946	0.97623	-0.01251	0.16569	0.97209	0.0035	0.3878	0.97534	0.05218	0.37675	0.97032	0.03183	0.31837	0.96288	0.04067	0.70368	0.97595	0.13996	0.42038	0.97613	0.10337	-0.02609
Note
SNPs of 12 populations were collected from 1000 Genomes phase1
3 dataset (all haplotypes, haplotypes containing CNVR8163.1 deletions and haplotypes without CNVR8163.1 deletions) were generated for each population.
For instance, ASW represents all haplotypes from this population; ASW_NE1 represents ASW haplotypes with CNVR8163.1 deletions and ASW_NonNE1 represents haplotypes without CNVR8163.1 deletions
All YRI haplotypes don't contain CNVR8163.1 deletion. One haplotype from PUR population containing CNVR8163.1 deletion was excluded from this analysis
