# Supplementary material for: Balancing Selection on a Regulatory Region Exhibiting Ancient Variation That Predates Human–Neandertal Divergence
Source: PLoS Genet. 2013 Apr 11;9(4):e1003404. doi: 10.1371/journal.pgen.1003404 (PMC3623772; doi:10.1371/journal.pgen.1003404)
Supplement: Table S7 — Primers used in this study. (XLSX) [file pgen.1003404.s017.xlsx]

## Sheet: Table S7
Table S7: Primers used in this study
Amplicaition and Sanger sequencing of CNVR8163.1 locus	Forward	GTGTGCACCAATGCACTCAACTGAA
	Reverse	AACTCCAGCCATAAGATAGCAGT
Analysis of promoter activity of LTR regions
Full Length LTR	Forward	GATCCCCGGGTGTAACCGAGTATCCCAGCCTCG
	Reverse	GATCGTCGACTTGGGGCAAACAGCTTTCCTTAGCC
For Deleted LTR38-int fragment in both NE1 and nonNE1 samples	Forward	GATCGTCGACTTGGGGCAAACAGCTTTCCTTAGCC
	Reverse	GATCCTCGAGGTTATTTATTTATTAACCATTTTAAAAGTCTG
ChIP-qPCR Primers
P1	Forward	GCACTCCAGTCTCAGCAAC
	Reverse	ACCCCCAGGAAGACTTGAAT
P2	Forward	GGATTCTTCTCTGTGACCCTGA
	Reverse	CCCAAGGGCTCTGAGACTAC
P3	Forward	GATGCTGCTGGATTTTAGGC
	Reverse	CCCAAATACTCCCCACCAC
P4	Forward	CAGACAGGCTGCGATGAATA
	Reverse	TGATGGGTCAAAGTCAGCAG
P5	Forward	GCTGATTGCTTCCTTGTGGT
	Reverse	GGAGACAACCAGACCTTACA
P6	Forward	TCCCAGCAGTCTGTGATAGC
	Reverse	ATCACTCCTCAGTCCCCAGA
P7	Forward	AAACCCAAACAAAACCAAAA
	Reverse	GGAGACTGAGGTGGGAGGAT
Positive Control	Forward	GCTTCGGACTTTACCACTGC
	Reverse	AATCCGAGACGCTCTGCTTA
Negative Control	Forward	GGAGCACACAGCCCTTTC
	Reverse	GAGGTGGGGTGAAAGGAAA
